# Supplementary material for: Combined Comparative Genomics and Gene Expression Analyses Provide Insights into the Terpene Synthases Inventory in Trichoderma
Source: MDPI journal article supplement (doi:10.3390/microorganisms8101603), 2020-10-18
Supplement: s1 [file s1]

**Table S4. TS-gene content per each *Trichoderma* spp.** Terpene synthase--protein groups identified by computational analysis are highlighted in different colours according to those used in Figure 1 and Figure S1, in different shadows depending on the gene amount per each species. Specific portions of the terpenoid inventory are boxed in red.

| Strain                            | N° TSs | <i>B. bassiana</i><br>ARSEF2860 | <i>T. virens</i><br>Gv29-8 | <i>T. pleurotica</i><br>Tr1 | <i>T. pleuroti</i><br>TPhu1 | <i>T. harzianum</i><br>CBS 226.95 | <i>T. harzianum</i><br>TR274 | <i>T. guizhouense</i><br>NJAU 4742 | <i>T. afroharzianum</i><br>T6776 | <i>T. atrobrunneum</i><br>ITEM 908 | <i>T. atroviride</i><br>IMI 206040 | <i>T. gamsii</i><br>A5MH | <i>T. gamsii</i><br>T6085 | <i>T. hamatum</i><br>GD12 | <i>T. asperellum</i><br>TR356 v1.0 | <i>T. asperellum</i><br>CBS 433.97 | <i>T. arundinaceum</i><br>IBT 40837 | <i>T. brevicompactum</i><br>IBT 40841 | <i>T. citrinoviride</i><br>TUCIM 6016 | <i>T. longibrachiatum</i><br>ATCC 18648 | <i>T. parareesei</i><br>CBS 125925 | <i>T. reesei</i><br>RUT C-30 | <i>T. reesei</i><br>QM6a |  |
|-----------------------------------|--------|---------------------------------|----------------------------|-----------------------------|-----------------------------|-----------------------------------|------------------------------|------------------------------------|----------------------------------|------------------------------------|------------------------------------|--------------------------|---------------------------|---------------------------|------------------------------------|------------------------------------|-------------------------------------|---------------------------------------|---------------------------------------|-----------------------------------------|------------------------------------|------------------------------|--------------------------|--|
| TS-family size                    | 387    | 16                              | 20                         | 23                          | 23                          | 18                                | 18                           | 19                                 | 20                               | 16                                 | 18                                 | 15                       | 16                        | 15                        | 21                                 | 20                                 | 20                                  | 21                                    | 18                                    | 15                                      | 16                                 | 17                           | 18                       |  |
| HAD-like                          | 7      | 0                               | 0                          | 0                           | 0                           | 0                                 | 0                            | 0                                  | 0                                | 0                                  | 1                                  | 1                        | 1                         | 0                         | 2                                  | 2                                  | 0                                   | 0                                     | 0                                     | 0                                       | 0                                  | 0                            | 0                        |  |
| Uncharacterized group 1           | 8      | 1                               | 0                          | 0                           | 0                           | 0                                 | 0                            | 0                                  | 0                                | 0                                  | 1                                  | 0                        | 1                         | 1                         | 1                                  | 1                                  | 0                                   | 0                                     | 0                                     | 1                                       | 0                                  | 1                            | 1                        |  |
| TRI5                              | 7      | 1                               | 0                          | 0                           | 0                           | 0                                 | 0                            | 1                                  | 0                                | 0                                  | 0                                  | 1                        | 1                         | 0                         | 1                                  | 1                                  | 1                                   | 1                                     | 0                                     | 0                                       | 0                                  | 0                            | 0                        |  |
| Uncharacterized group 2           | 14     | 0                               | 1                          | 0                           | 0                           | 0                                 | 0                            | 0                                  | 0                                | 0                                  | 2                                  | 2                        | 2                         | 2                         | 2                                  | 2                                  | 1                                   | 0                                     | 0                                     | 0                                       | 0                                  | 0                            | 0                        |  |
| Longiborneol synthases            | 15     | 1                               | 1                          | 1                           | 1                           | 1                                 | 1                            | 1                                  | 1                                | 1                                  | 0                                  | 0                        | 0                         | 0                         | 0                                  | 0                                  | 1                                   | 1                                     | 1                                     | 1                                       | 1                                  | 1                            | 1                        |  |
| Presilphiperfolan-8β-ol synthases | 16     | 0                               | 1                          | 2                           | 2                           | 1                                 | 1                            | 1                                  | 2                                | 0                                  | 0                                  | 0                        | 0                         | 0                         | 0                                  | 0                                  | 0                                   | 1                                     | 1                                     | 1                                       | 1                                  | 1                            | 1                        |  |
| Pentalenene synthases             | 22     | 0                               | 1                          | 1                           | 2                           | 1                                 | 1                            | 1                                  | 1                                | 1                                  | 1                                  | 1                        | 1                         | 1                         | 1                                  | 1                                  | 1                                   | 1                                     | 1                                     | 1                                       | 1                                  | 1                            | 1                        |  |
| Uncharacterized group 3           | 7      | 0                               | 0                          | 1                           | 1                           | 1                                 | 1                            | 1                                  | 1                                | 1                                  | 0                                  | 0                        | 0                         | 0                         | 0                                  | 0                                  | 0                                   | 0                                     | 0                                     | 0                                       | 0                                  | 0                            | 0                        |  |
| Uncharacterized group 4           | 58     | 0                               | 5                          | 6                           | 4                           | 3                                 | 3                            | 3                                  | 3                                | 3                                  | 3                                  | 1                        | 1                         | 2                         | 2                                  | 2                                  | 3                                   | 4                                     | 3                                     | 1                                       | 2                                  | 2                            | 2                        |  |
| Squalene synthases                | 22     | 1                               | 1                          | 1                           | 2                           | 1                                 | 1                            | 1                                  | 1                                | 1                                  | 1                                  | 1                        | 1                         | 1                         | 1                                  | 1                                  | 1                                   | 1                                     | 1                                     | 1                                       | 1                                  | 1                            | 1                        |  |
| GGTases 1                         | 21     | 1                               | 1                          | 1                           | 1                           | 1                                 | 1                            | 1                                  | 1                                | 1                                  | 1                                  | 1                        | 1                         | 1                         | 1                                  | 1                                  | 1                                   | 1                                     | 1                                     | 1                                       | 1                                  | 1                            | 1                        |  |
| GGTases 2                         | 21     | 1                               | 1                          | 1                           | 1                           | 1                                 | 1                            | 1                                  | 1                                | 1                                  | 1                                  | 1                        | 1                         | 1                         | 1                                  | 1                                  | 1                                   | 1                                     | 1                                     | 1                                       | 1                                  | 1                            | 1                        |  |
| FTases                            | 21     | 1                               | 1                          | 1                           | 1                           | 1                                 | 1                            | 1                                  | 1                                | 1                                  | 1                                  | 1                        | 1                         | 1                         | 1                                  | 1                                  | 1                                   | 1                                     | 1                                     | 1                                       | 1                                  | 1                            | 1                        |  |
| Uncharacterized group 5           | 21     | 2                               | 1                          | 1                           | 1                           | 1                                 | 1                            | 1                                  | 1                                | 1                                  | 1                                  | 1                        | 1                         | 1                         | 1                                  | 1                                  | 1                                   | 1                                     | 1                                     | 1                                       | 1                                  | 1                            | 1                        |  |
| Oxidosqualene cyclases            | 21     | 1                               | 1                          | 1                           | 1                           | 1                                 | 1                            | 1                                  | 1                                | 1                                  | 1                                  | 1                        | 1                         | 1                         | 1                                  | 1                                  | 1                                   | 1                                     | 1                                     | 1                                       | 1                                  | 1                            | 1                        |  |
| Diterpene synthases               | 8      | 0                               | 0                          | 0                           | 0                           | 0                                 | 0                            | 0                                  | 0                                | 0                                  | 0                                  | 0                        | 0                         | 0                         | 1                                  | 1                                  | 1                                   | 1                                     | 1                                     | 0                                       | 1                                  | 1                            | 1                        |  |
| GGPP synthases                    | 22     | 1                               | 1                          | 1                           | 1                           | 1                                 | 1                            | 1                                  | 1                                | 1                                  | 1                                  | 1                        | 1                         | 1                         | 1                                  | 1                                  | 1                                   | 1                                     | 2                                     | 1                                       | 1                                  | 1                            | 1                        |  |
| FPP synthases                     | 31     | 1                               | 1                          | 2                           | 2                           | 2                                 | 2                            | 2                                  | 2                                | 1                                  | 1                                  | 1                        | 1                         | 1                         | 1                                  | 1                                  | 3                                   | 3                                     | 1                                     | 1                                       | 1                                  | 1                            | 1                        |  |
| Indole diTS                       | 23     | 1                               | 2                          | 1                           | 1                           | 1                                 | 1                            | 1                                  | 1                                | 1                                  | 2                                  | 1                        | 1                         | 1                         | 1                                  | 1                                  | 1                                   | 1                                     | 1                                     | 1                                       | 1                                  | 1                            | 1                        |  |
| Chimeric-like                     | 22     | 3                               | 1                          | 2                           | 2                           | 1                                 | 1                            | 1                                  | 2                                | 1                                  | 0                                  | 0                        | 0                         | 0                         | 2                                  | 1                                  | 1                                   | 1                                     | 1                                     | 1                                       | 1                                  | 1                            | 2                        |  |
|                                   |        |                                 |                            |                             |                             |                                   |                              |                                    |                                  |                                    |                                    |                          |                           |                           |                                    |                                    |                                     |                                       |                                       |                                         |                                    |                              |                          |  |
| CLADE                             |        | VIRENS                          |                            |                             |                             | HARZIANUM                         |                              |                                    |                                  | VIRIDE                             |                                    |                          |                           |                           | BREVICOMPACTUM                     |                                    |                                     |                                       | LONGIBRACHIATUM                       |                                         |                                    |                              |                          |  |
