# Supplementary material for: Combined Comparative Genomics and Gene Expression Analyses Provide Insights into the Terpene Synthases Inventory in Trichoderma
Source: MDPI journal article supplement (doi:10.3390/microorganisms8101603), 2020-10-18
Supplement: s1 [file s1]

**Table S1. *Trichoderma* spp. and *Beauveria bassiana* genomic platform.** Complete genome sequences of *Trichoderma* spp. and *B. bassiana* were obtained from public databases of NCBI and *JGI* databases. Whole Genome Sequencing (WGS) Project accessions of each species are listed in the second column. Phylogeny according to Kubicek et al. (2019) [30] and information about the isolation of each strain are also shown.

| Strain                                        | WGS Project    | Phylogeny             | Isolate information                                                                             | Reference   |
|-----------------------------------------------|----------------|-----------------------|-------------------------------------------------------------------------------------------------|-------------|
| <i>Beauveria bassiana</i> ARSEF 2860          | ADAH00000000.1 | Outgroup              | Isolated from aphid cadavers (Idaho, USA)                                                       | [39]        |
| <i>Trichoderma asperellum</i> CBS 433.97      | MBGH00000000.1 | Clade Viride          | Isolated from soil (Maryland, USA)                                                              | [40]        |
| <i>Trichoderma asperellum</i> TR356 v1.0      | Unreleased     | Clade Viride          | Isolated from soil (Brazil)                                                                     | [30]        |
| <i>Trichoderma hamatum</i> GD12               | ANCB00000000.2 | Clade Viride          | Isolated from potato field (UK)                                                                 | [41]        |
| <i>Trichoderma gamsii</i> A5MH                | MTYH00000000.1 | Clade Viride          | Isolated from wheat cropping soil (Australia)                                                   | Unpublished |
| <i>Trichoderma gamsii</i> T6085               | JPDN00000000.2 | Clade Viride          | Isolated from soil (Ukraine)                                                                    | [42]        |
| <i>Trichoderma atroviride</i> IMI 206040      | ABDG00000000.2 | Clade Viride          | Isolated from a plum tree (Sweden)                                                              | [29]        |
| <i>Trichoderma arundinaceum</i> IBT 40837     | PXOA00000000.1 | Clade Brevicompactum  | Isolated from soil (Iran)                                                                       | [43]        |
| <i>Trichoderma brevicompactum</i> IBT 40841   | PXNZ00000000.1 | Clade Brevicompactum  | Isolated from soil (Iran)                                                                       | [43]        |
| <i>Trichoderma citrinoviride</i> TUCIM 6016   | MBDI00000000.1 | Clade Longibrachiatum | Unknown                                                                                         | [40]        |
| <i>Trichoderma longibrachiatum</i> ATCC 18648 | MBDJ00000000.1 | Clade Longibrachiatum | Isolated from mud (Ohio, USA)                                                                   | [40]        |
| <i>Trichoderma parareesei</i> CBS 125925      | LFMI00000000.1 | Clade Longibrachiatum | Isolated from subtropical rain forest (Argentina)                                               | [44]        |
| <i>Trichoderma reesei</i> QM6a                | AAIL00000000.2 | Clade Longibrachiatum | Isolated from Salomon Islands                                                                   | [45]        |
| <i>Trichoderma reesei</i> RUT C-30            | JABP00000000.1 | Clade Longibrachiatum | Obtained from three rounds of random mutagenesis of QM6a strain                                 | [46]        |
| <i>Trichoderma virens</i> Gv29-8              | ABDF00000000.2 | Clade Virens          | Isolated from rhizosphere                                                                       | [29]        |
| <i>Trichoderma pleuroticola</i> Tr1           | MTYI00000000.1 | Clade Harzianum       | Submitted as <i>T. harzianum</i> - Isolated from carbendazim contaminated vineyard soil (China) | Unpublished |
| <i>Trichoderma pleuroti</i> TPhu1             | MDJU00000000.1 | Clade Harzianum       | Isolated from oyster mushroom (Hungary)                                                         | [47]        |
| <i>Trichoderma harzianum</i> CBS 226.95       | MBGI00000000.1 | Clade Harzianum       | Isolated from soil (England, UK)                                                                | [40]        |
| <i>Trichoderma harzianum</i> TR274            | NQLC00000000.1 | Clade Harzianum       | Isolated from soil (Brazil)                                                                     | [30]        |
| <i>Trichoderma guizhouense</i> NJAU 4742      | LVVK00000000.1 | Clade Harzianum       | Isolated from soil with compost of traditional Chinese medicine (China)                         | [40]        |
| <i>Trichoderma afroharzianum</i> T6776        | JOKZ00000000.1 | Clade Harzianum       | Submitted as <i>T. harzianum</i> - Isolated from soil (Pisa, Italy)                             | [48]        |
| <i>Trichoderma atrobrunneum</i> ITEM 908      | PNRQ00000000.1 | Clade Harzianum       | Isolated from <i>Olea europaea</i> (Puglia, Italy)                                              | [49]        |
