# Supplementary material for: Combined Comparative Genomics and Gene Expression Analyses Provide Insights into the Terpene Synthases Inventory in Trichoderma
Source: MDPI journal article supplement (doi:10.3390/microorganisms8101603), 2020-10-18
Supplement: s1 [file s1]

Table S2. Terpene synthase proteins functionally characterized in filamentous fungi.

| Strain                                     | Accession      | Function                                                     | Classification                                       | Reference |
|--------------------------------------------|----------------|--------------------------------------------------------------|------------------------------------------------------|-----------|
| <i>Fusarium fujikuroi</i> m567             | CAA75244.1     | copalyl pyrophosphate synthase/ent-kaurene synthase          | Bifunctional Class II Cyclase - diTS                 | [53]      |
| <i>Fusarium fujikuroi</i> m567             | CAD19988.1     | phytoene synthase-lycopene cyclase polypeptide               | Class I PT GFPP synthase - Class I Cyclase - tetraTS | [54]      |
| <i>Fusarium sporotrichioides</i> NRRL 3299 | AAN05035.1     | trichodiene synthase                                         | Class I Cyclase - sesquiTS                           | [55]      |
| <i>Fusarium graminearum</i> GZ3639         | ACY69978.1     | longiborneol synthase                                        | Class I Cyclase - sesquiTS                           | [56]      |
| <i>Fusarium graminearum</i> H3             | ABR87941.1     | trichodiene synthase                                         | Class I Cyclase - sesquiTS                           | [57]      |
| <i>Fusarium sambucinum</i> R-6380          | AAB02038.1     | trichodiene synthase <i>tox5</i>                             | Class I Cyclase - sesquiTS                           | [58]      |
| <i>Sphaceloma maniticola</i> Lu949         | CAP07655.1     | copalyl pyrophosphate synthase/ent-kaurene synthase          | Bifunctional Class II Cyclase - diTS                 | [59]      |
| <i>Phoma betae</i> Frank PS-16             | BAD29971.1     | aphidicolan-16 $\beta$ -ol synthase                          | Bifunctional Class II Cyclase - diTS                 | [60]      |
| <i>Phoma betae</i> N2                      | BAF45924.1     | fusicoccadiene synthase <i>PaFs</i>                          | Bifunctional Chimeric Class I Cyclase-PT - diTS      | [61]      |
| <i>Aspergillus clavatus</i> NRRL 1         | A1C8C3.1       | ophiobolin synthase <i>AcOS</i>                              | Bifunctional Chimeric Class I Cyclase-PT - sesterTS  | [62]      |
| <i>Aspergillus variegator</i> NBRC 32302   | BAU98235.1     | astellifadiene synthase                                      | Bifunctional Chimeric Class I Cyclase-PT - sesterTS  | [63]      |
| <i>Aspergillus variegator</i> NBRC 32302   | BAX76657.1     | quiannulatene synthase                                       | Bifunctional Chimeric Class I Cyclase-PT - sesterTS  | [64]      |
| <i>Aspergillus variegator</i> NBRC 32302   | BAT32888.1     | variediene synthase                                          | Bifunctional Chimeric Class I Cyclase-PT - sesterTS  | [65]      |
| <i>Aspergillus terreus</i> ATCC 20516      | AAF13263.1     | aristolochene synthase                                       | Class I Cyclase - sesquiTS                           | [66]      |
| <i>Aspergillus fumigatus</i> Af293         | XP_747936.1    | oxidosqualene cyclase/protosta17(20)Z,24-dien-3b-ol synthase | Class II Cyclase - triTS                             | [67]      |
| <i>Aspergillus flavus</i> NRRL6541         | AAT65718.1     | biosynthesis of aflatrem <i>atmC</i>                         | IPPS PT aromatic - indolediTS                        | [68]      |
| <i>Aspergillus flavus</i> NRRL3357         | XP_002378991.1 | pentalenene synthase putative                                | Class I Cyclase - sesquiTS                           | [69]      |
| <i>Penicillium brasilianum</i> NBRC 6234   | BBD05404.1     | sesterbrasiliatriene synthase                                | Bifunctional Chimeric Class I Cyclase-PT - sesterTS  | [70]      |
| <i>Penicillium verruculosus</i> TPU1311    | BBD05405.1     | preasperterpenoid synthase                                   | Bifunctional Chimeric Class I Cyclase-PT - sesterTS  | [70]      |
| <i>Penicillium roqueforti</i> NRRL 849     | AAA33694.1     | aristolochene synthase as                                    | Class I Cyclase - sesquiTS                           | [71]      |
| <i>Penicillium paxilli</i> PN2013          | AAK11531.1     | biosynthesis of paxilline (indolediterpene) <i>paxG</i>      | IPPS PT aromatic - indolediTS                        | [72]      |
| <i>Botrytis cinerea</i> T4                 | AAQ16575.1     | presilphiperfolan-8 $\beta$ -ol synthase <i>BcBOT2</i>       | Class I Cyclase - sesquiTS                           | [73]      |
| <i>Botrytis cinerea</i> B05.10             | XP_001550978.1 | <i>Bcsct5</i> ABA biosynthesis                               | Class I Cyclase - sesquiTS                           | [74]      |
| <i>Cephalosporium caerulens</i>            | AAL56020.1     | oxidosqualene cyclase/lanosterol synthase                    | Class II Cyclase - triTS                             | [75]      |
| <i>Neurospora crassa</i> 15300             | AAA19428.1     | phytoene synthase-lycopene cyclase polypeptide               | Class I PT GFPP synthase - Class I Cyclase - tetraTS | [76]      |
| <i>Neotyphodium lolii</i> Lp19             | ABF20225.1     | biosynthesis of lolitrem B                                   | IPPS PT aromatic - indolediTS                        | [77]      |
| <i>Hypoxylon</i> sp. E7406B                | AHY23922.1     | 1,8 cineole synthase                                         | Class I Cyclase - monoTS                             | [78]      |
| <i>Ganoderma lucidum</i> CGMCC 5.616       | AHN91949.1     | squalene synthase sqs                                        | Class I PT - triTS                                   | [79]      |
| <i>Trichoderma brevicompactum</i> IBT40841 | CAX94841.1     | trichodiene synthase                                         | Class I Cyclase - sesquiTS                           | [24]      |
| <i>Trichoderma arundinaceum</i> IBT40837   | CBX36793.1     | trichodiene synthase                                         | Class I Cyclase - sesquiTS                           | [21]      |
| <i>Trichoderma reesei</i> QM6a             | AFX82678.1     | FPP synthase <i>erg20</i>                                    | Class I PT – sesquiTS, triTS                         | [26]      |
| <i>Trichoderma virens</i> Gv29-8           | ABE60722.1     | volatile sesquiterpene and monoterpene biosynthesis          | Class I TS                                           | [27]      |
