# Supplementary material for: Combined Comparative Genomics and Gene Expression Analyses Provide Insights into the Terpene Synthases Inventory in Trichoderma
Source: MDPI journal article supplement (doi:10.3390/microorganisms8101603), 2020-10-18
Supplement: s1 [file s1]

**Table S3. Primer sequences used for gene expression analysis (5' to 3').**

| Name    | Sequence                 | Gene             | Amplicon size |
|---------|--------------------------|------------------|---------------|
| TUB-F   | GCTACCTGACCTGCTGCTCTAT   | <i>β-tubulin</i> | 128 bp        |
| TUB-R   | AGTCTGGATGTTGTTGGGGAT    |                  |               |
| TRI5s-F | TTCTGCGTCATTATGGAGGC     | <i>tri5</i>      | 137 bp        |
| TRI5s-R | AAGGAAGCCAGGATAGTCGC     |                  |               |
| TS1-F   | TCAACGCCCACTACCCAGA      | <i>ts1</i>       | 205 bp        |
| TS1-R   | ACCGTGTCGTCCCAGCAG       |                  |               |
| TS3-F   | GATTTTACATCATCCCACCCC    | <i>ts3</i>       | 113 bp        |
| TS3-R   | CAGTTGGCGGAGGACTTCAG     |                  |               |
| TS4-F   | ATCACAAATGGCGGCAAGA      | <i>ts4</i>       | 235 bp        |
| TS4-R   | CAGCGTGGAAGAAGAAAATAGTC  |                  |               |
| TS5-F   | TGCTTAGTGTTACCGTCCTTCTG  | <i>ts5</i>       | 153 bp        |
| TS5-R   | TAATCTTCTTCTTCATCTTGGGC  |                  |               |
| TS6-F   | CCTTTTCTTTGCTGTCGTGG     | <i>ts6</i>       | 198 bp        |
| TS6-R   | GCAGTTTCTCGGCTGTCATTC    |                  |               |
| TS7-F   | GGTCATCTCTCCGCATTTCCC    | <i>ts7</i>       | 183 bp        |
| TS7-R   | CTCACTACTCCATTCATCGCTGTT |                  |               |
| TS9-F   | AAACCATAAACTCAGCCAACTACG | <i>ts9</i>       | 198 bp        |
| TS9-R   | CAGTCTTGTTCCCCACCATCTC   |                  |               |
| TS11-F  | CAACTCGGGCAGGCGGAC       | <i>ts11</i>      | 139 bp        |
| TS11-R  | TCGGCGATACTGTTTGAAGCA    |                  |               |
